# Supplementary material for: Bladder cancer in Aboriginal and Torres Strait Islander people living in Australia: a scoping review protocol
Source: HighWire-hosted journal article supplement (doi:10.1136/bmjopen-2021-059144), 2022-04-01
Supplement: bmjopen-2021-059144supp002_data_supplement.pdf [file bmjopen-2021-059144supp002_data_supplement.pdf]

## Appendix II: Data Extraction Instrument

### Literature Characteristics:

- Year of publication.
- Authors.
- Literature Title.
- First Author Institution.
- Target Audience of Literature.
  - o Academia, Public Health Workforce, Policy, General Interest
- Source of Literature:
  - o Database, Grey Literature Resource
- Literature Type:
  - o Study (Quantitative, qualitative), Information Resource (Patients/Support Persons, Health-Care Workers).
- Primary Outcome: If literature a form of study.
- Study Population: If literature a form of study.
  - o Total Participants.
  - o Size of Comparative Groups.
  - o Follow-up time.

### Aboriginal and Torres Strait Islander People Within Literature (ATSIPWL):

- Proportion of population ATSI PWL.
- Age
- Gender
- Comorbidities
- Exposure Risk Factors:
  - o Smoking History
  - o Arsenic Exposure
  - o Carcinogen Exposure:
- Geographic Location: Remoteness.

### Bladder Cancer Clinical Features:

- Histological Type.
- Histopathological Grade.
- Presence of Muscle Invasive Disease at Diagnosis.
- Clinical Stage at Diagnosis.

### Timeliness of Investigation and Treatment:

- Wait-time to specialist review.
- Wait-time to endoscopic treatment.
- Distance to treatment centre (from residence).

### Treatment and Surveillance:

- Proportion of patients referred for radiation that undergo treatment.
- Radiation Treatment Specifics:
  - o Indication: Palliative vs Curative Intent
  - o Dosage: Gy and number of fractions.
- Proportion of patients referred to medical oncologist who undergo treatment.
- Specifics of Medical Oncology Treatment:
  - o Indication:

- Treatment Details
- Proportion of patients undertaking routine endoscopic surveillance after treatment.

Bladder Cancer Outcomes:

- Overall Survival.
- Recurrence Free Survival.
- Progression Free Survival.
- Bladder Cancer Specific Survival.

Structural Determinants of Health:

- Cultural and societal values:
- Effect of socioeconomic position:
- Effect of ethnicity.

Intermediary Determinants of Health:

- Barriers due to material circumstances or geographic location:
- Behavioural Factors.
- Psychosocial Factors.
- Health System Factors.

Cross-Cutting Determinants of Health:

- Effects of Social Cohesion.
